# Supplementary material for: Specialized role of migratory dendritic cells in peripheral tolerance induction
Source: JCI journal article supplement (doi:10.1172/jci65260), 2013-01-09
Supplement: sd1 [file 1]

## SUPPLEMENTAL METHODS

**Antibodies and Flow Cytometry.** mAbs to Langerin (L31), DEC (NLDC), DCIR2 (33D1), Trem14 (16E5), and a control Ig mAb without receptor affinity (GL117) were produced in-house, purified on protein G columns, and labeled with Alexa Fluor 647 (Life Technologies) per manufacturer's instructions. All flow cytometry stainings were preceded by a 15 min incubation at 4°C with  $\alpha$ -CD16/CD32 mAbs (produced in house from 2.4G2 hybridoma, ATCC). Cell suspensions were stained using antibodies from eBioscience or BD Biosciences: Alexa Fluor 700 and PerCP-Cy5.5  $\alpha$ -CD4 (RM4-5), allophycocyanin and PerCP-Cy5.5  $\alpha$ -CD25 (PC61), allophycocyanin  $\alpha$ -Foxp3 (FJK-16s), FITC, PerCP-Cy5.5 and PE-Cy7  $\alpha$ -CD45.1 (A20) and  $\alpha$ -CD45.2 (104), Alexa Fluor 700  $\alpha$ -CD45 (30-F11), Alexa Fluor 700 and eFluor 450  $\alpha$ -CD3 $\epsilon$  (145-2C11), PerCP-Cy5.5  $\alpha$ -CD8 $\alpha$  (53-6.7), APC-eFluor 780 and PerCP-Cy5.5  $\alpha$ -CD11b (M1/70), APC-eFluor 780  $\alpha$ -CD11c (N418), PE and PE-Cy7  $\alpha$ -CD11c (HL3), Alexa Fluor 700  $\alpha$ -MHC II (M5/114.15.2), Alexa Fluor 488  $\alpha$ -IL-2 (JES6-5H4), allophycocyanin  $\alpha$ -CD62L (MEL-14), FITC and PE  $\alpha$ -CD45RB (C363.16A), PE and PerCP-CY5.5  $\alpha$ -CD103 (2E7), PE  $\alpha$ -CTLA-4 (UC10-4B9),  $\alpha$ -ICOS (7E.17G9),  $\alpha$ -V $\beta$ 11 (RR3-15),  $\alpha$ -PD-1 (J43), and  $\alpha$ -SiglecF (E50-2440), PE and PE-Cy7  $\alpha$ -CD44 (IM7), PE-Cy7  $\alpha$ -GITR (DTA-1),  $\alpha$ -CD19 (1D3),  $\alpha$ -Ter119 (TER-119),  $\alpha$ -CD49b (DX5),  $\alpha$ -CD5 (53-7.3),  $\alpha$ -IFN- $\gamma$  (XMG1.2), and  $\alpha$ -CD127 (A7R34). PE  $\alpha$ -PDCA-1 (JF05-1C2.4.1) was from Miltenyi Biotec, and PerCP-Cy5.5  $\alpha$ -CD103 (2E7) and  $\alpha$ -IL-17A (TC11-18H10.1) were from Biolegend. Samples were acquired on an LSRII and data were analyzed using FlowJo software (Tree Star).

**Suppression Assay.** B6 mice were transferred with  $4 \times 10^6$  2D2 Foxp3-EGFP CD45.1 CD4<sup>+</sup> T cells one day before the s.c. inoculation of 3  $\mu$ g  $\alpha$ -Langerin- or  $\alpha$ -DEC- MOGp (day 0). At day 14, Foxp3-EGFP<sup>+</sup> or Foxp3-EGFP<sup>-</sup> CD45.1<sup>+</sup> transferred cells were FACS-sorted from sLN and their function was assessed in an in vitro suppression assay. In brief,  $5 \times 10^4$  violet-labeled (1  $\mu$ M CellTrace violet for 10 min at 37°C) responder MOG-specific CD45.2<sup>+</sup> CD4<sup>+</sup> T cells/well were cultured in a U-bottom 96-well plate with  $1 \times 10^4$  CD11c-bead purified splenic DCs from CD45.1 B6 mice and 12.5  $\mu$ g/ml MOG35-55p. Sorted Foxp3-EGFP<sup>+</sup> CD45.1<sup>+</sup> or Foxp3-EGFP<sup>-</sup> CD45.1<sup>+</sup> T cells were added to the well in decreasing numbers (responder/suppressor ratios = 1:1/3, 1:1/9, 1:1/27, and 1:1/81). Proliferation of responder cells was measured by dilution of the CellTrace violet 4 days later by FACS gating in live CD4<sup>+</sup> CD45.2<sup>+</sup> V $\beta$ 11<sup>+</sup> cells. For mixed leukocyte reaction (MLR),  $1 \times 10^5$  fresh CD4<sup>+</sup> T cells from Balb/c Thy1.1 mice labeled with CellTrace violet (responders) were stimulated with  $2 \times 10^4$  CD11c-bead purified splenic DCs from B6 CD45.2 mice. Graded numbers of sorted MOG-specific CD45.2<sup>+</sup> Foxp3-EGFP<sup>+</sup> cells were added to the cultures in the absence or presence of 12.5  $\mu$ g/ml MOG35-55p. Proliferation of responder cells was measured by the dilution of the CellTrace violet 4 days later by FACS gating in live CD4<sup>+</sup> Thy1.1<sup>+</sup> cells. The percentage of suppression was calculated as follow:  $[1 - (\% \text{ of proliferated T responders in cultures with suppressors} / \% \text{ of proliferated T responders in cultures without suppressors})] \times 100$ .

**Isolation of CNS-infiltrating cells.** Spinal cords of PBS-perfused mice were mechanically disrupted and digested with Collagenase D (400 U/ml, Roche Diagnostics)

and 50 µg/ml DNase I for 35 min at 37°C, adding 5 µM EDTA for the last 5 min of incubation. Mononuclear cells were enriched by Percoll gradient (67.5% - 30%) centrifugation (800g for 20 min).

**Intracellular cytokine staining.** Cells were stimulated with either 12.5 µg/ml MOG35-55p, or 100 ng/ml PMA (Sigma-Aldrich) and 0.5 µg/ml ionomycin (Sigma-Aldrich) at 37°C for 5-6 hrs, adding Brefeldine A (10 µg/ml; Sigma-Aldrich) for the last 4-5 hrs to allow accumulation of intracellular cytokines. After staining of surface markers, cells were fixed and permeabilized, followed by staining with  $\alpha$ -IL-17A,  $\alpha$ -IFN- $\gamma$ , and IL-2.

## Supplemental Figure 1

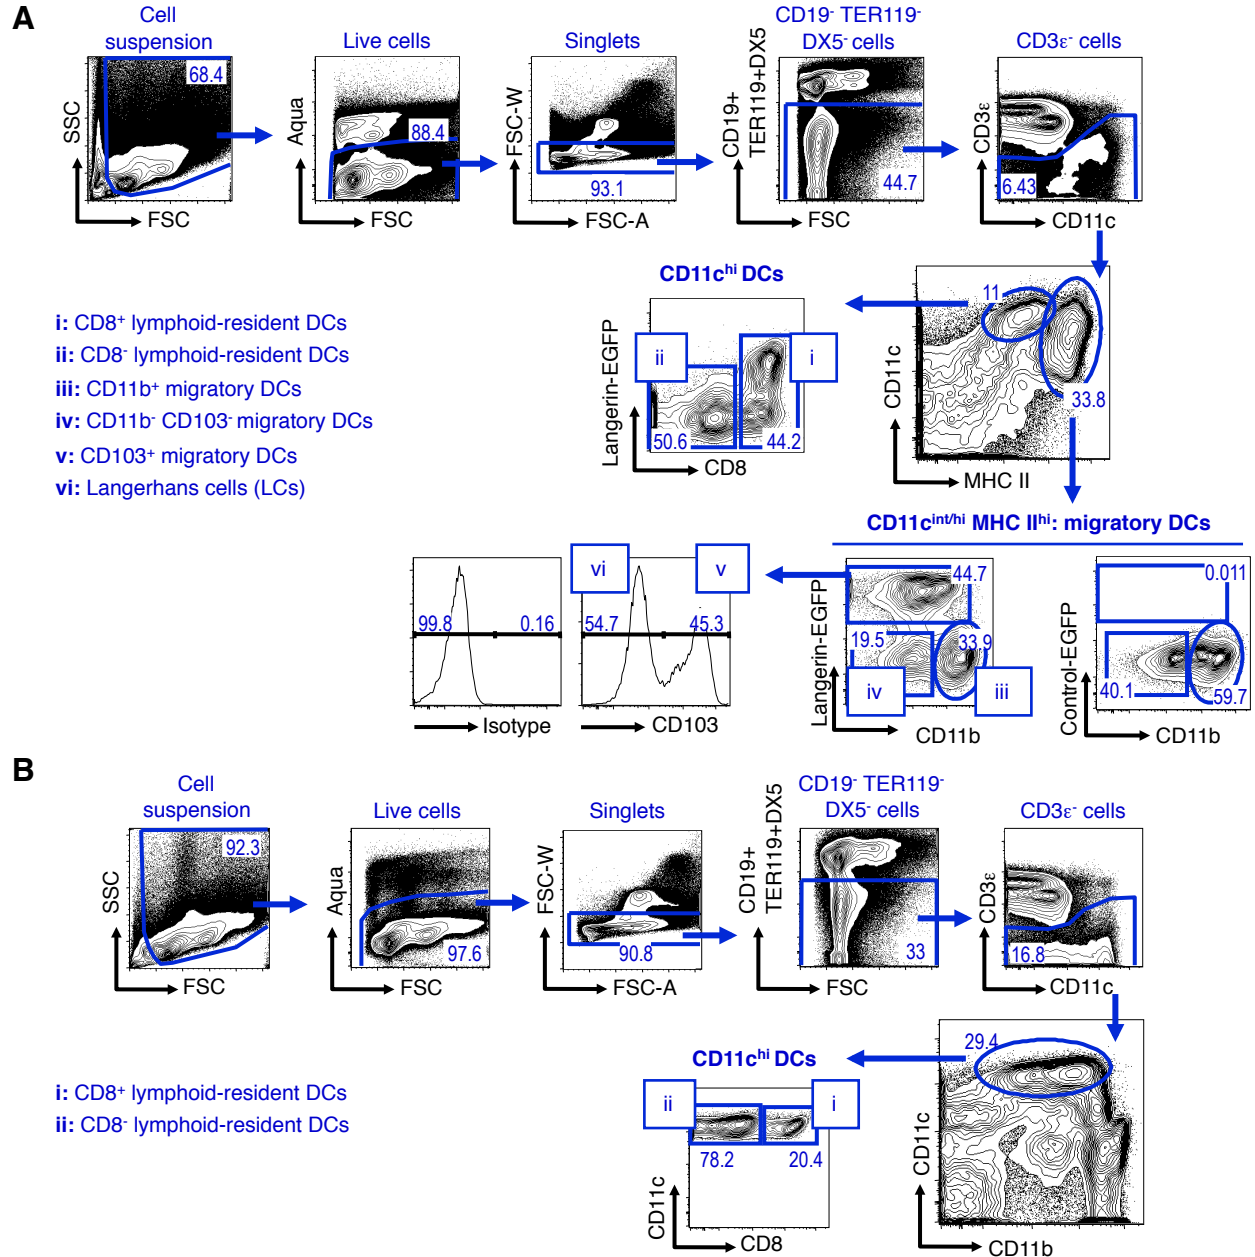

**Supplemental Figure 1. Gating strategy to define DCs subsets in the skin draining LN and spleen.** sLN (A) and spleen (B) of Langerin-EGFP mice were harvested and digested using Collagenase D/ DNase I. Whole cell suspensions were stained with a cocktail of antibodies to detect distinct DC subsets. **(A)** Within the single cells suspension, dead cells, doublets, CD19<sup>+</sup>, TER119<sup>+</sup>, DX5<sup>+</sup> and CD3 $\epsilon$ <sup>+</sup> cells were excluded from analysis. The CD11c<sup>hi</sup> MHC II<sup>int</sup> population represents lymphoid-resident DCs, and can be further divided into CD8<sup>+</sup> (gate i) and CD8<sup>-</sup> DCs (gate ii). CD11c<sup>int/hi</sup> MHC II<sup>hi</sup> cells were further analyzed for the expression of Langerin-EGFP and CD11b to define skin migratory DC subsets. Langerin<sup>-</sup> cells were divided into CD11b<sup>+</sup> DCs (gate iii) and CD11b<sup>-</sup> DCs (gate iv). Langerin<sup>+</sup> cells were further analyzed for the expression of CD103, dividing them into two groups: CD103<sup>+</sup> DCs (gate v) and CD103<sup>-</sup> LCs (gate vi). **(B)** Splenic live cells, singlets, CD19<sup>-</sup>, TER119<sup>-</sup>, DX5<sup>-</sup> and CD3 $\epsilon$ <sup>-</sup> cells were selected for further analysis and examined for the expression of CD11c and CD11b. The CD11c<sup>hi</sup> population represents lymphoid-resident DCs in the spleen and can be further divided into CD8<sup>+</sup> (gate i) and CD8<sup>-</sup> DCs (gate ii).

## Supplemental Figure 2

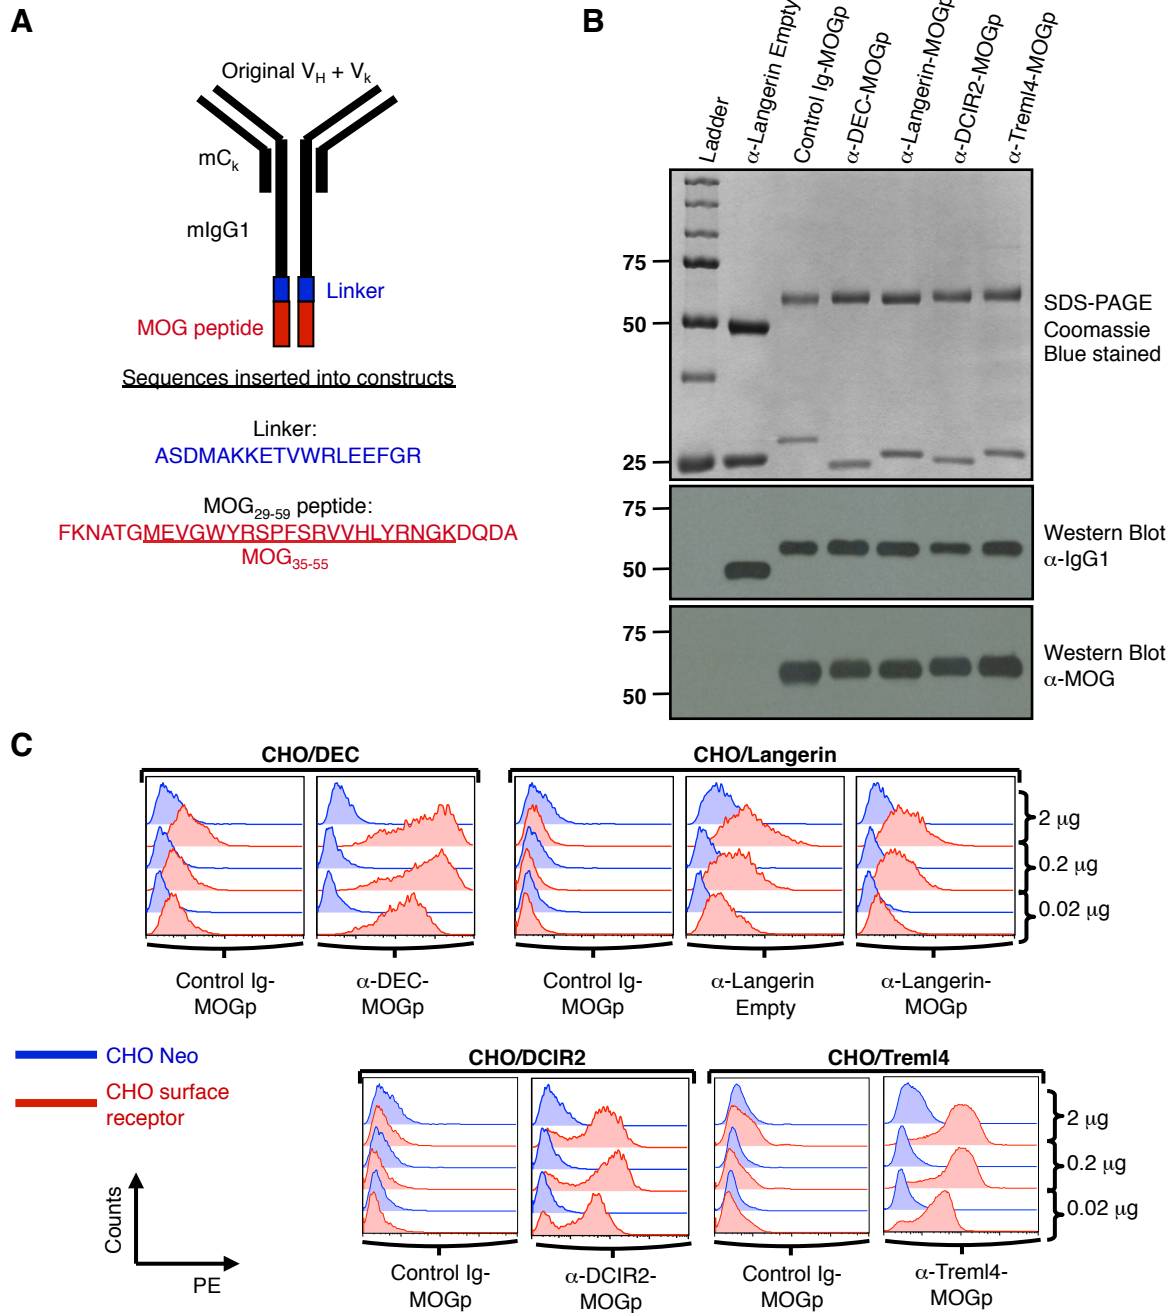

**Supplemental Figure 2. Quality control of  $\alpha$ -receptor mAbs genetically engineered to express MOGp.** (A) Diagrammatic representation of the  $\alpha$ -receptor mAb conjugated with MOGp. Constant regions of the original  $\alpha$ -receptor mAbs, as well as a control Ig mAb, were replaced by that of the mouse IgG1 and modified to avoid Fc-receptor binding (26). The sequence inserted into the C-terminus domain of the mouse IgG1 heavy chain corresponds to a small linker (blue) and the 29-59 peptide from the myelin oligodendrocyte glycoprotein (MOG; red) containing amino acids 35-55 (underlined). (B) Coomassie-stained 10% SDS/PAGE reducing gel comparing fusion mAbs with molecular mass in kDa indicated (upper panel). Western blots of fusion mAbs using HRP-conjugated  $\alpha$ -mouse IgG1 (middle panel) or Biotin-conjugated  $\alpha$ -MOG followed by HRP-Sva (lower panel). (C) FACS analysis of the binding of  $\alpha$ -receptor-MOGp mAbs to CHO cells transfected to express different receptors, i.e., DEC, Langerin, DCIR2, Trem14 (red), and control untransfected CHO cells (NEO; blue), using graded doses (0.02-2  $\mu$ g) of fusion mAbs followed by  $\alpha$ -mouse IgG PE.

## Supplemental Figure 3

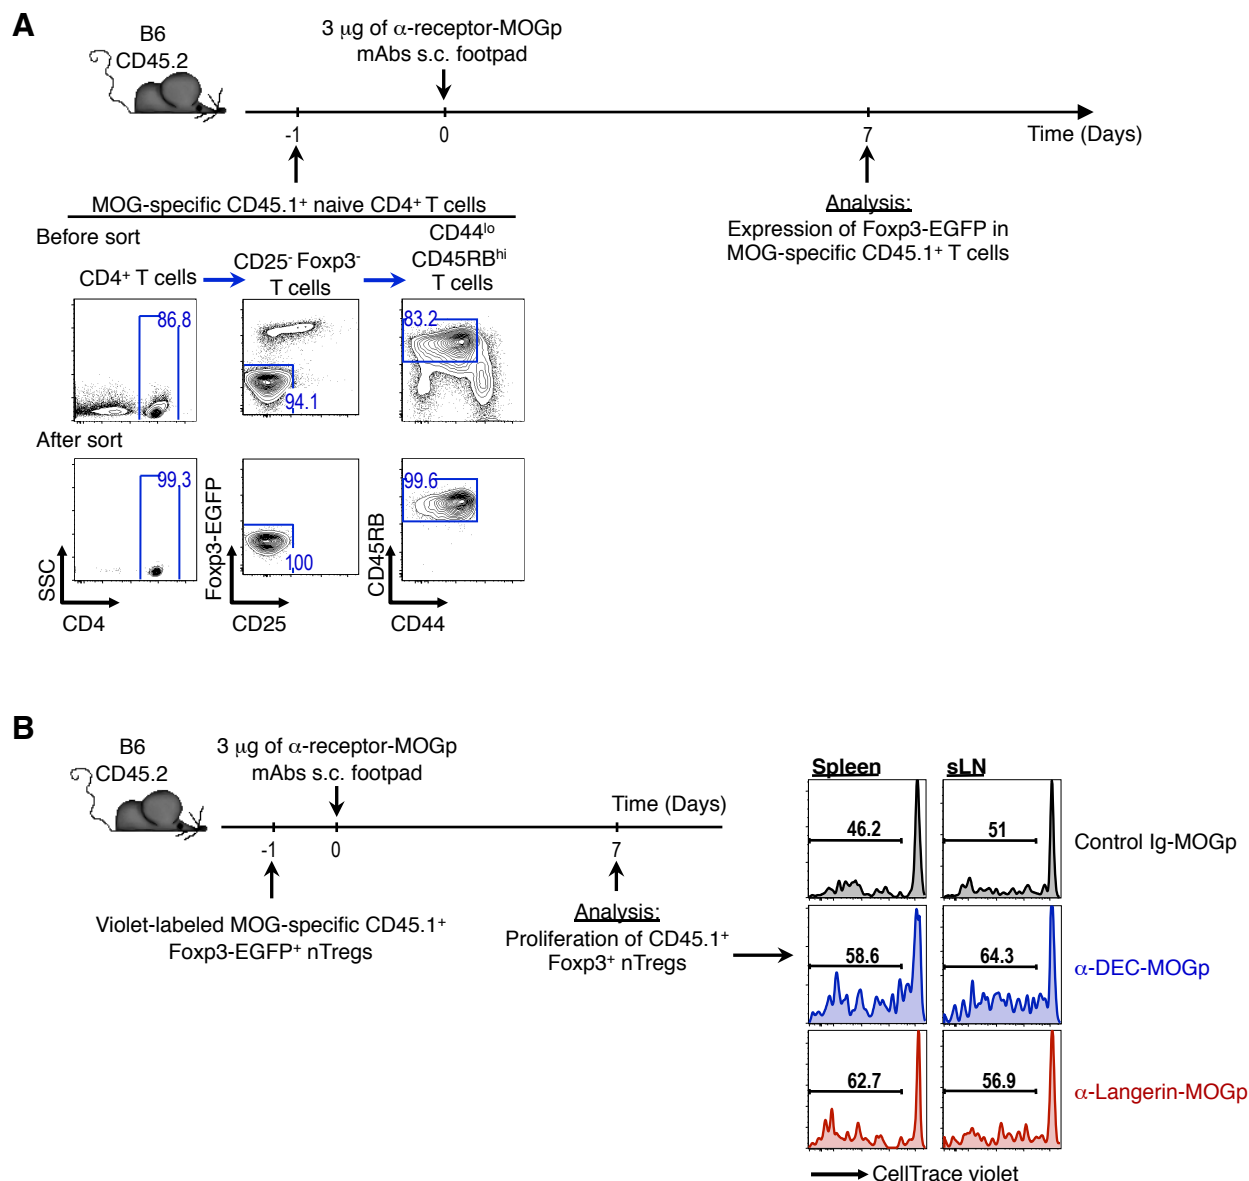

**Supplemental Figure 3. Experimental design to evaluate the de novo induction of Foxp3<sup>+</sup> T cells, and the expansion of natural Tregs by  $\alpha$ -receptor-MOGp mAbs.** **(A)** De novo generation of Foxp3<sup>+</sup> T cells from naive CD4<sup>+</sup> T cells.  $4 \times 10^6$  MOG-specific CD45.1<sup>+</sup> naive T cells were purified by FACS from MOG-specific Foxp3-EGFP reporter mice (CD25<sup>-</sup>, Foxp3-EGFP<sup>-</sup>, CD44<sup>lo</sup>, CD45RB<sup>hi</sup>), and were transferred into CD45.2 recipient mice. One day later, mice were inoculated s.c. footpad with 3 µg of  $\alpha$ -receptor-MOGp mAbs. The generation of Foxp3-EGFP<sup>+</sup> T cells in spleen and sLN was evaluated by FACS 7 days later (shown in Figure 2B). **(B)** Expansion of Foxp3<sup>+</sup> nTregs by  $\alpha$ -receptor-MOGp mAbs.  $1 \times 10^6$  CD45.1<sup>+</sup> Foxp3<sup>+</sup> nTregs, FACS-sorted from MOG-specific Foxp3-EGFP reporter mice, were labeled with CellTrace violet and then transferred into CD45.2 recipient mice. On the next day, mice were injected s.c. with 3 µg of  $\alpha$ -Langerin-,  $\alpha$ -DEC- or control Ig- MOGp. 7 days after antigen inoculation, the proliferation of Violet-labeled CD45.1<sup>+</sup> Foxp3<sup>+</sup> nTregs was evaluated by FACS in spleen and sLN. Histograms are gated on CD45.1<sup>+</sup> Foxp3-EGFP<sup>+</sup> CD4<sup>+</sup> T cells. Shown are the frequencies of Foxp3<sup>+</sup> nTregs undergoing one or more cell divisions representative of 3 experiments with similar results.

## Supplemental Figure 4

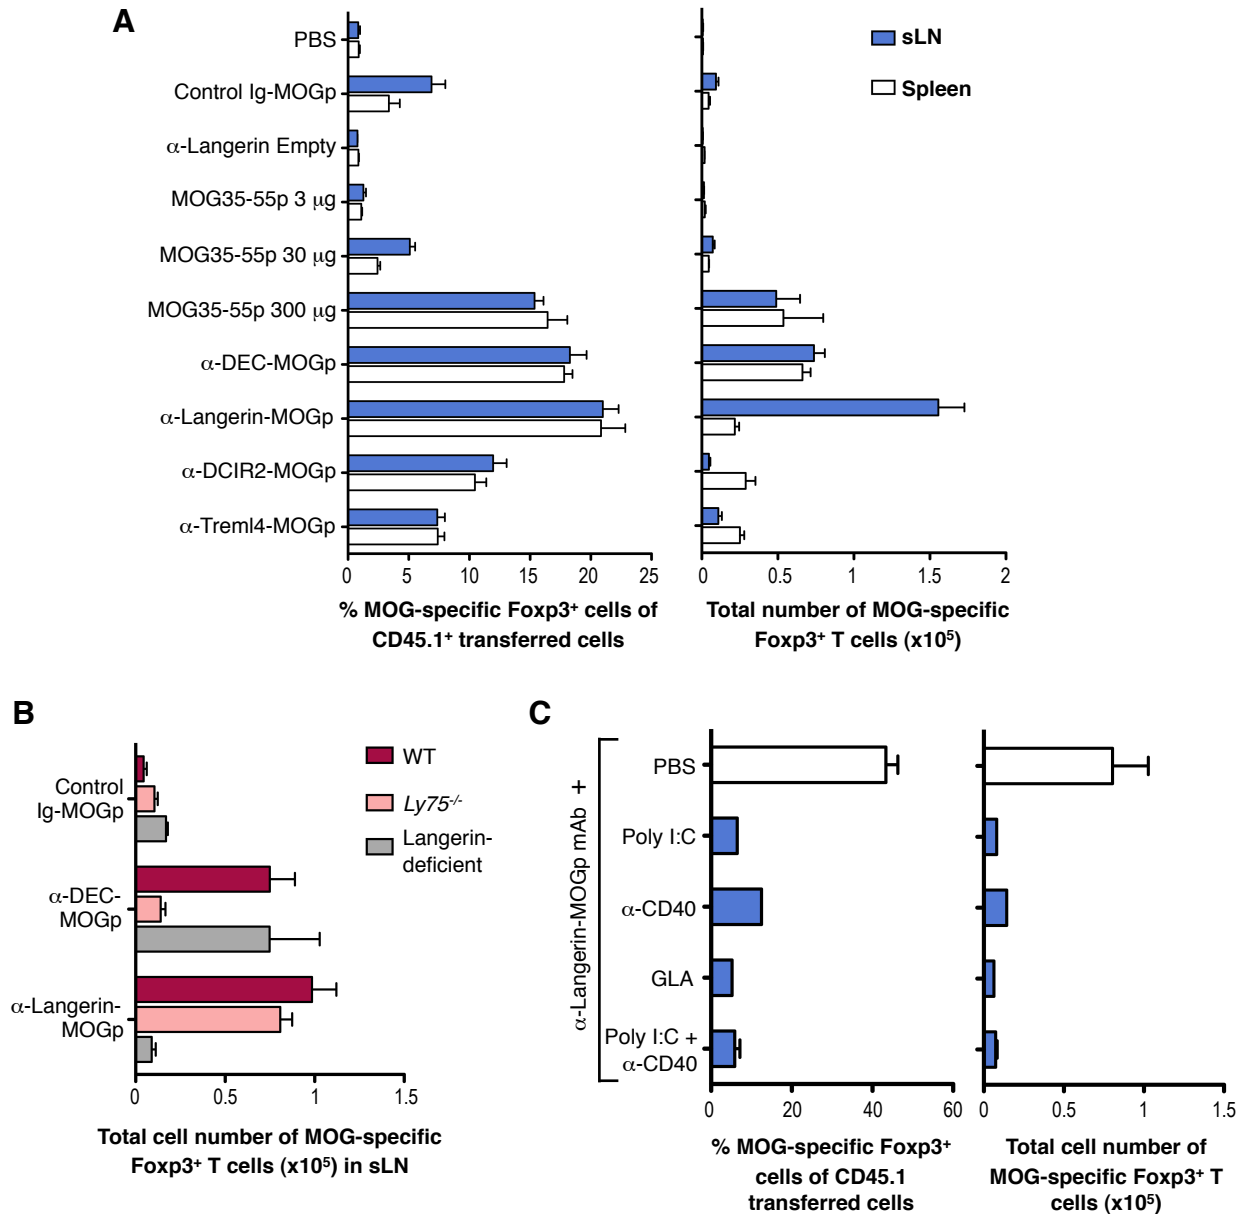

**Supplemental Figure 4. Foxp3<sup>+</sup> T cell generation in vivo using  $\alpha$ -DEC and  $\alpha$ -Langerin mAbs require steady-state DEC<sup>+</sup> and Langerin<sup>+</sup> DCs.** (A) B6 CD45.2 mice were transferred with  $4 \times 10^6$  MOG-specific CD45.1<sup>+</sup> CD4<sup>+</sup> T cells. One day later, mice were inoculated with 3  $\mu$ g of different  $\alpha$ -receptor mAbs conjugated with MOGp, control Ig-MOGp mAbs without receptor affinity, un-conjugated  $\alpha$ -Langerin mAb, or different doses of soluble untargeted MOG35-55p (3-300  $\mu$ g). 7 days after antigen inoculation, the percentage (left panel) and total number (right panel) of Foxp3<sup>+</sup> T cells were evaluated in the sLN and spleen. Bar graphs show the mean  $\pm$  SEM of 2-10 experiments with a total of 4-20 animals. (B) As in A, but WT, DEC-deficient (*Ly75*<sup>-/-</sup>) or Langerin-deficient mice were inoculated s.c. with MOGp coupled to  $\alpha$ -Langerin,  $\alpha$ -DEC or control Ig mAbs. Total number of Foxp3<sup>+</sup> T cells at day 7 in sLN is shown as the mean  $\pm$  SEM of two experiments with a total of 4 mice. (C) As in A, but mice received a s.c. (footpad) inoculation of 3  $\mu$ g of  $\alpha$ -Langerin-MOGp alone (PBS) or in combination with different DC-maturation stimuli, and analysis was performed at day 14 in sLN. Shown is the mean  $\pm$  SEM of 2 different experiments with 2 animals.

## Supplemental Figure 5

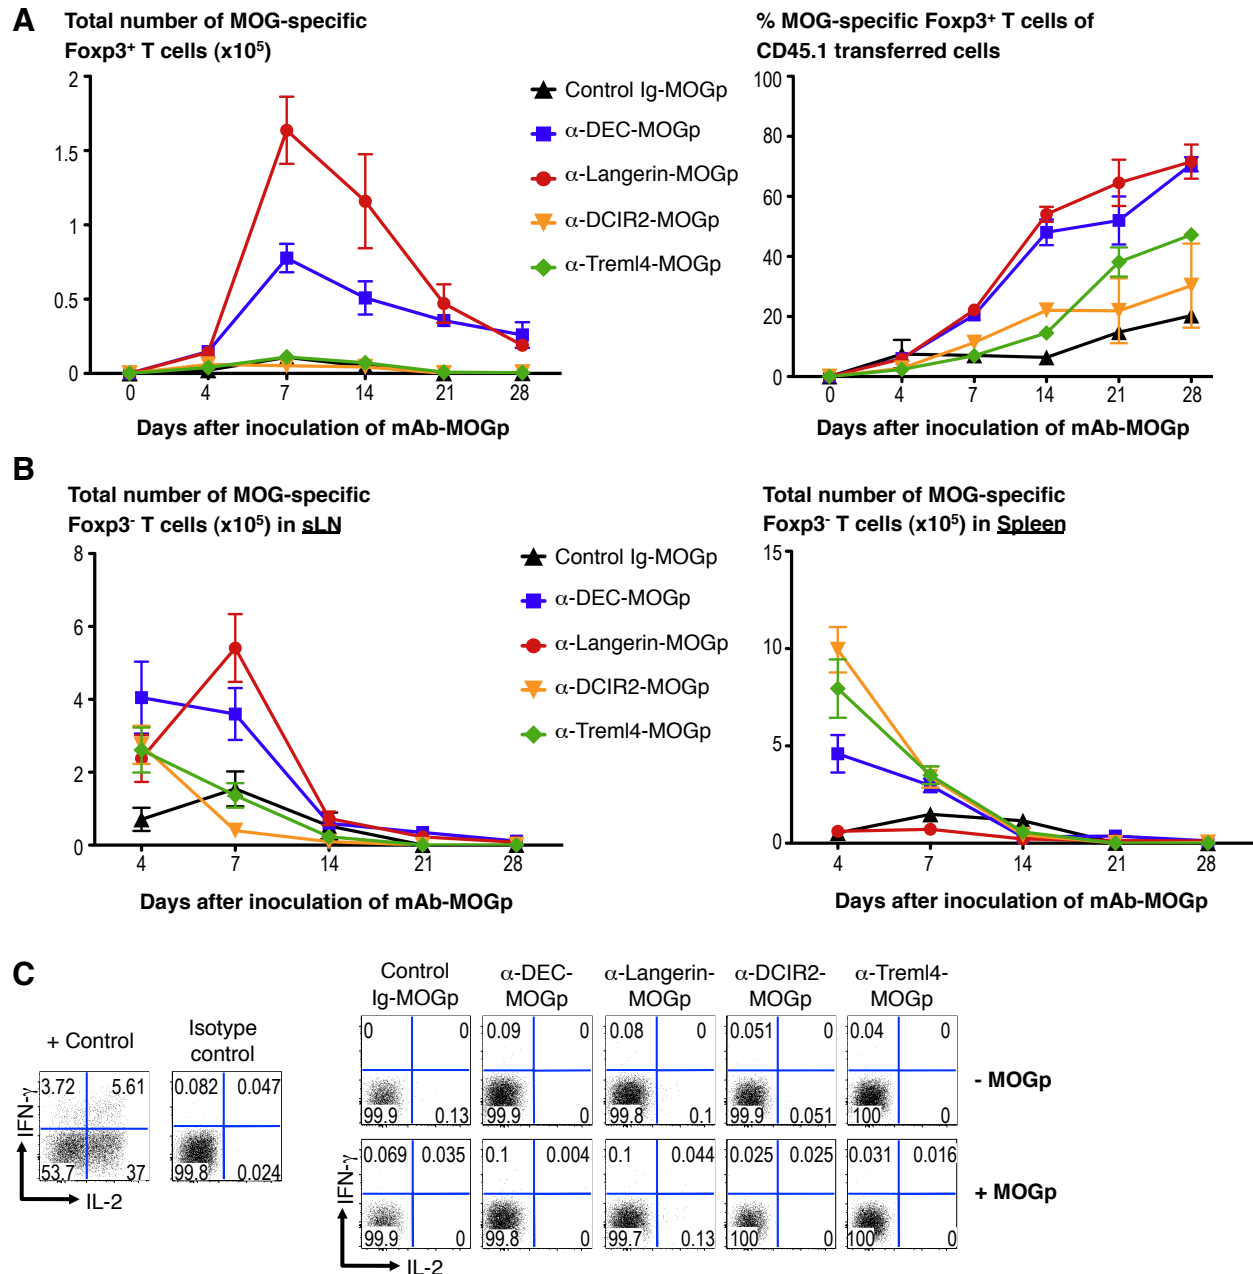

**Supplemental Figure 5. Kinetics of Foxp3<sup>+</sup> T cell generation triggered by  $\alpha$ -receptor-MOGp mAbs.** (A) B6 CD45.2 mice were transferred with  $4 \times 10^6$  MOG-specific CD45.1<sup>+</sup> CD4<sup>+</sup> T cells one day before the s.c. inoculation of 3  $\mu$ g of  $\alpha$ -receptor-MOGp mAbs. 4-28 days after antigen inoculation, sLN were analyzed for the total number of Foxp3<sup>+</sup> cells (left panel) and the % of Foxp3<sup>+</sup> cells among CD45.1 transferred cells (right panel). The total number of Foxp3<sup>+</sup> T cells peaked at day 7-14, and gradually declined thereafter, however, significant numbers of MOG-specific Foxp3<sup>+</sup> T cells were still detected at day 28 after  $\alpha$ -DEC and  $\alpha$ -Langerin inoculation ( $\sim 2$ - $3 \times 10^4$  Foxp3<sup>+</sup> T cells). Data is shown as the mean  $\pm$  SEM of 2-7 independent experiments with a total of 4-14 animals. (B) As in A, but the fate of MOG-specific Foxp3<sup>+</sup> T cells was followed in the sLN (left panel) and spleen (right panel). (C) As in A, but 4 days after  $\alpha$ -receptor-MOGp mAbs inoculation, sLN cell suspensions were re-stimulated with 12.5  $\mu$ g/ml of MOG35-55p in the presence of BFA for 6 hrs followed by intracellular cytokine staining. As positive control, cell suspensions were stimulated with 2  $\mu$ g/ml of  $\alpha$ -CD3 mAb. One representative experiment of 2 is shown.



## Supplemental Figure 6

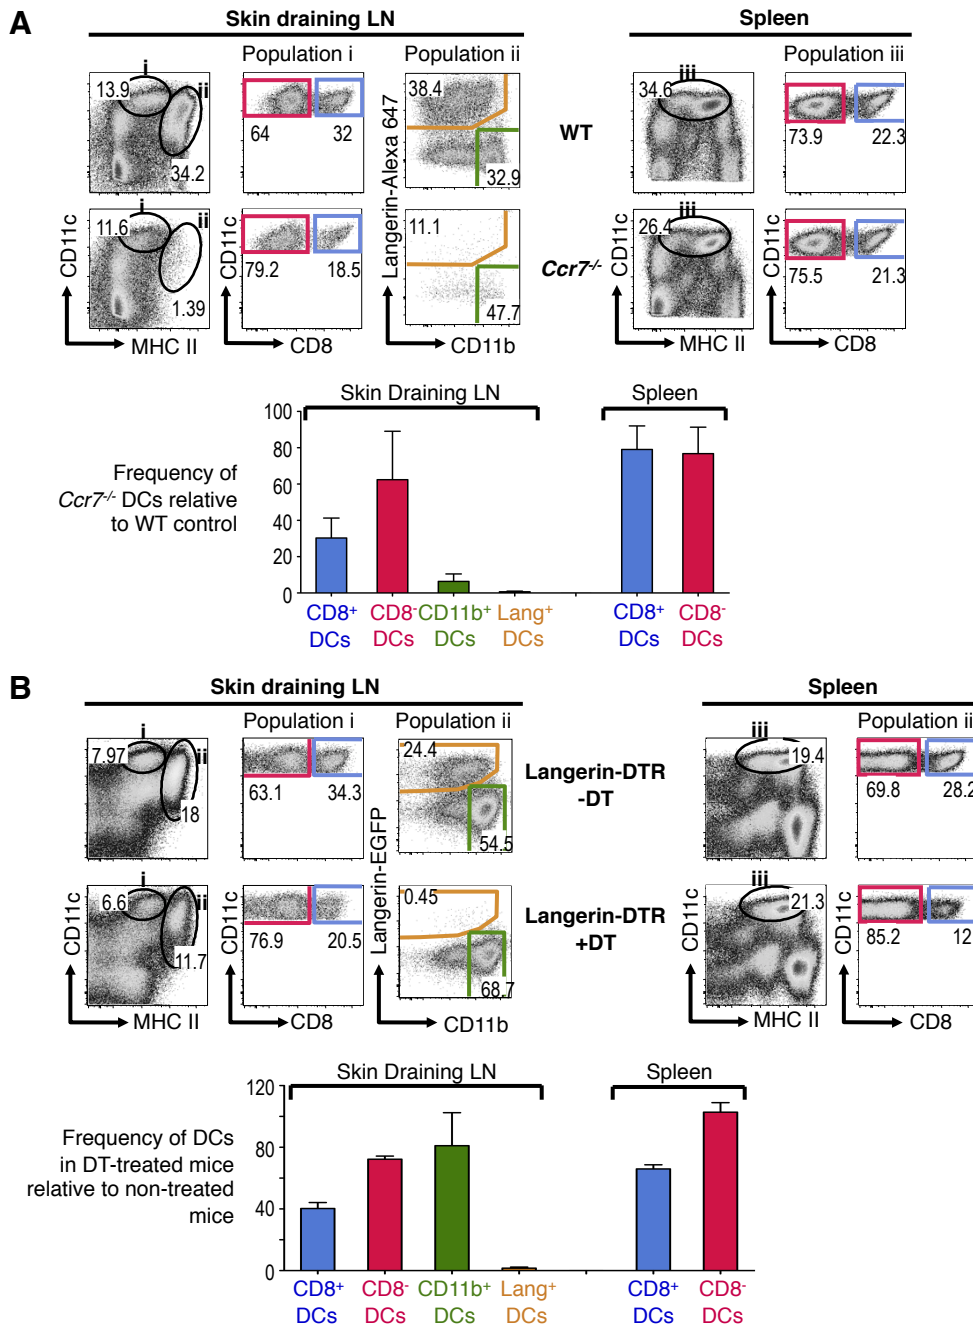

**Supplemental Figure 6. *Ccr7*<sup>-/-</sup> mice lack all subsets of skin migratory DCs, whereas DT-treated Langerin-DTR mice specifically lack CD103<sup>+</sup> migratory DCs and LCs. (A)** sLN and spleen of WT and *Ccr7*<sup>-/-</sup> mice were analyzed by flow cytometry for the percentage of DC subsets using the gating strategy from Supplemental Figure 1. Upper panels represent FACS plot showing lymphoid-resident CD11c<sup>hi</sup> DCs (population i and iii) and MHC II<sup>hi</sup> migratory DCs (population ii) in sLN (left panel) and spleen (right panels). Skin migratory DCs (MHC II<sup>hi</sup>, population ii) were further divided into Langerin<sup>+</sup> and CD11b<sup>+</sup> populations. The bottom bar graph shows the frequency of the indicated population in *Ccr7*<sup>-/-</sup> relative to WT controls as the mean  $\pm$  SEM of 4 experiments with 4-7 animals. **(B)** Langerin-DTR/EGFP mice were inoculated i.v. with 500 ng DT at day -1, followed by i.p. inoculations of 250 ng DT at day 1, 3 and 5. At day 7 DT-treated and non-treated mice were analyzed by FACS as in A. Mean  $\pm$  SEM of 2 experiments with a total of 4 mice is shown.

## Supplemental Figure 7

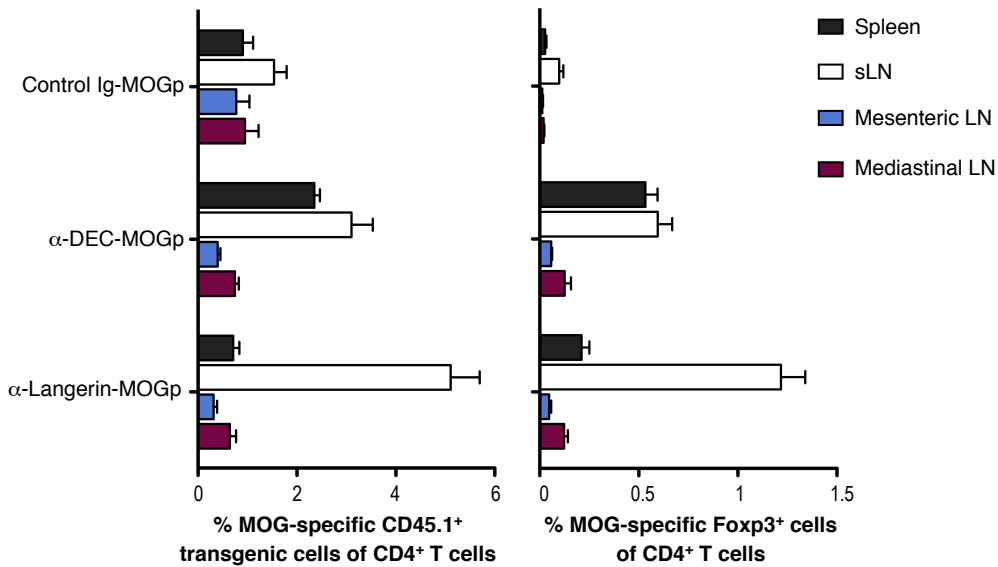

**Supplemental Figure 7. MOG-specific Foxp3<sup>+</sup> transgenic T cells accumulate preferentially in sLN, but not in LN draining the lung or gut, after inoculation of  $\alpha$ -Langerin- and  $\alpha$ -DEC- MOGp mAbs.**  $4 \times 10^6$  MOG-specific CD45.1 T cells were transferred into CD45.2 B6 recipient mice one day before the s.c. inoculation of  $\alpha$ -DEC-,  $\alpha$ -Langerin- or control Ig- MOGp mAbs. Spleen, sLN, mesenteric LN, and mediastinal LN were harvested at day 7 and analyzed for the expression of Foxp3 in MOG-specific transgenic T cells, identified by the leukocyte marker CD45.1 and the T-cell receptor (TCR) V $\beta$ 11. The left panel shows the frequency of MOG-specific CD45.1 transgenic T cells. The right panel shows the frequency of MOG-specific CD45.1 transgenic T cells expressing Foxp3. Data is shown as the mean  $\pm$  SEM of 2-4 experiments with 4-8 animals per group.

Supplemental Figure 8

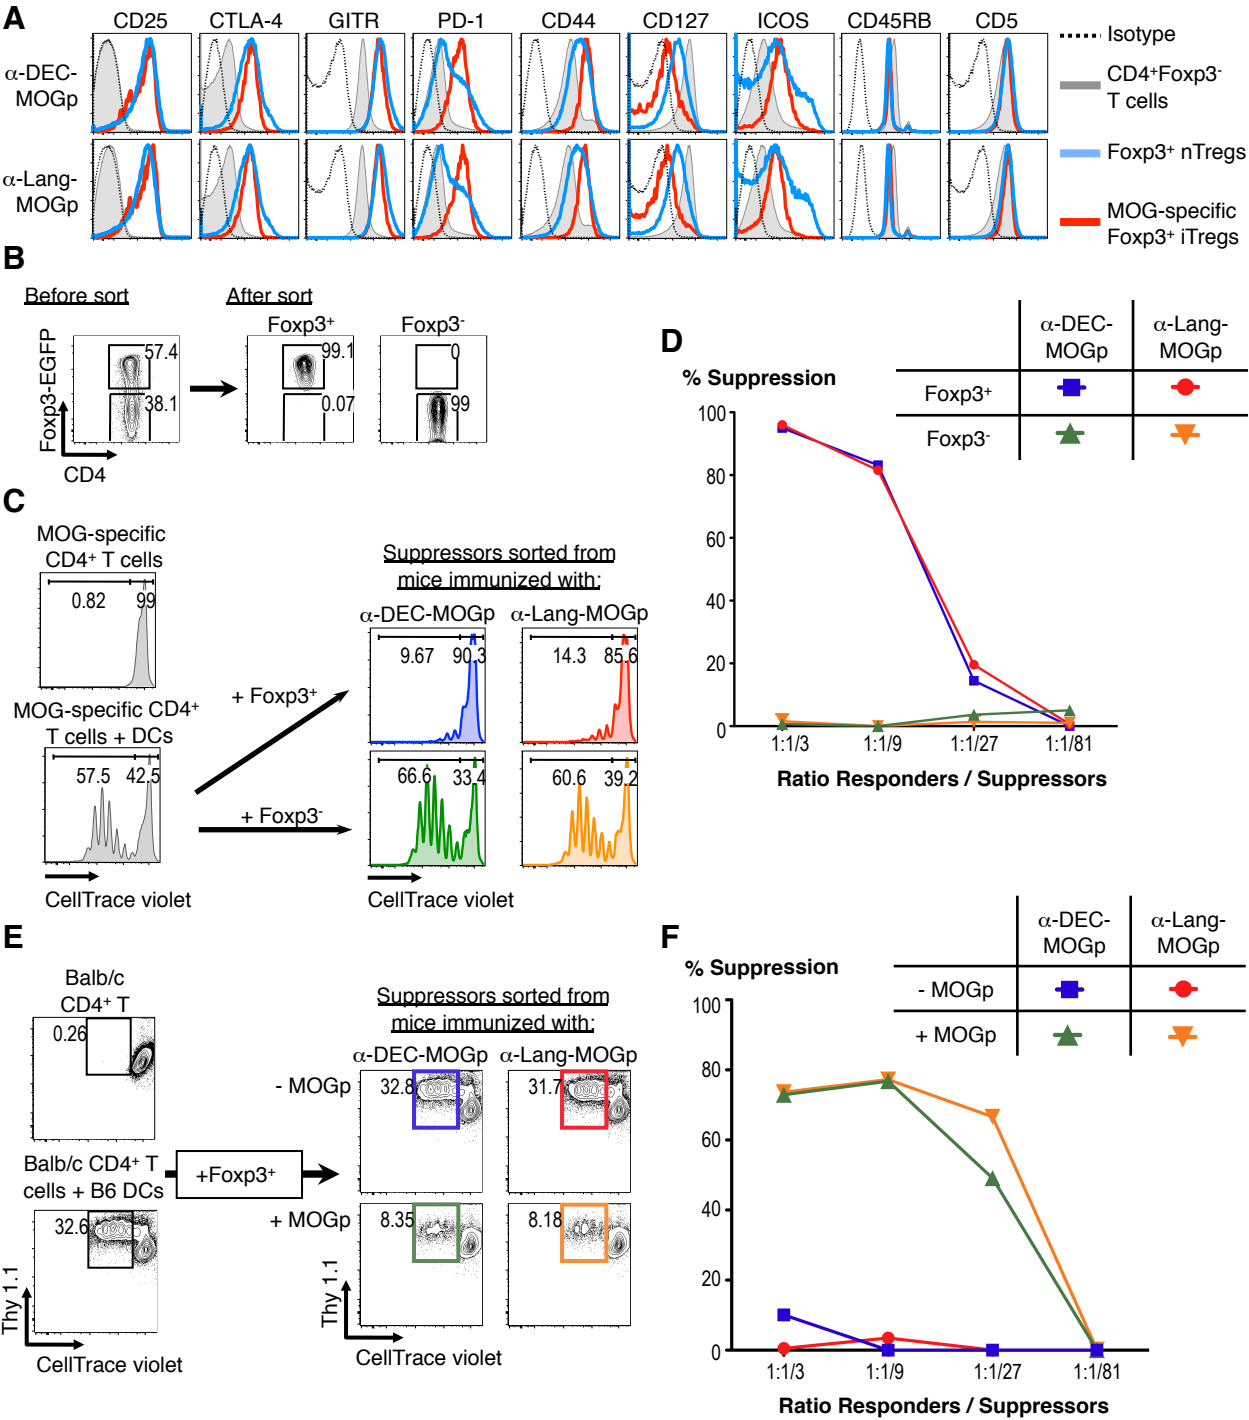

**Supplemental Figure 8.  $\alpha$ -Langerin and  $\alpha$ -DEC-induced Foxp3<sup>+</sup> T cells are functional Tregs.** B6 mice transferred with  $4 \times 10^6$  MOG-specific CD4<sup>+</sup> T cells, obtained from MOG-specific Foxp3-EGFP mice, were inoculated one day later with 3  $\mu$ g  $\alpha$ -receptor-MOGp mAb s.c., and analysis was performed at day 14 in sLN. **(A)** Phenotype of  $\alpha$ -receptor-MOGp mAb induced MOG-specific Foxp3<sup>+</sup> T cells (iTregs, red histograms), compared to Foxp3<sup>+</sup> nTregs (blue histogram) and Foxp3<sup>-</sup> CD4<sup>+</sup> T cells (gray filled histogram). One experiment of two analyzed by FACS. **(B)** MOG-specific Foxp3-EGFP<sup>+</sup> and Foxp3-EGFP<sup>-</sup> T cells before or after FACS-sorting (left and right panel, respectively). **(C)** Violet-labeled MOG-specific CD4<sup>+</sup> responder T cells (responders) were co-cultured with CD11c<sup>+</sup> DCs (5:1 ratio) plus 12.5  $\mu$ g/ml MOG35-55p. FACS-sorted Foxp3-EGFP<sup>+</sup> or Foxp3-EGFP<sup>-</sup> cells were added to the cultures (suppressors; 1:1/9 ratio). Responder cells proliferation was evaluated 4 days later by dilution of the CellTrace violet. **(D)** As in C, but the suppressors were added to the culture at the indicated ratios. Depicted is the % of suppression (see methods), as the mean of 2 independent experiments. **(E)** Foxp3-EGFP<sup>+</sup> T cells FACS-sorted as in B were tested for suppression in a mixed leukocyte reaction (MLR). Violet-labeled responders CD4<sup>+</sup> T cells from Balb/c mice were cultured with CD11c<sup>+</sup> DCs from B6 mice (5:1 ratio). MOG-specific Foxp3<sup>+</sup> T cells were added to the cultures (suppressors; 1:1/9 ratio) +/- 12.5  $\mu$ g/ml MOG35-55p. **(F)** As in E, but the suppressors cells were added at different ratios. Shown is the % of suppression as the mean of 2 experiments.

## Supplemental Figure 9

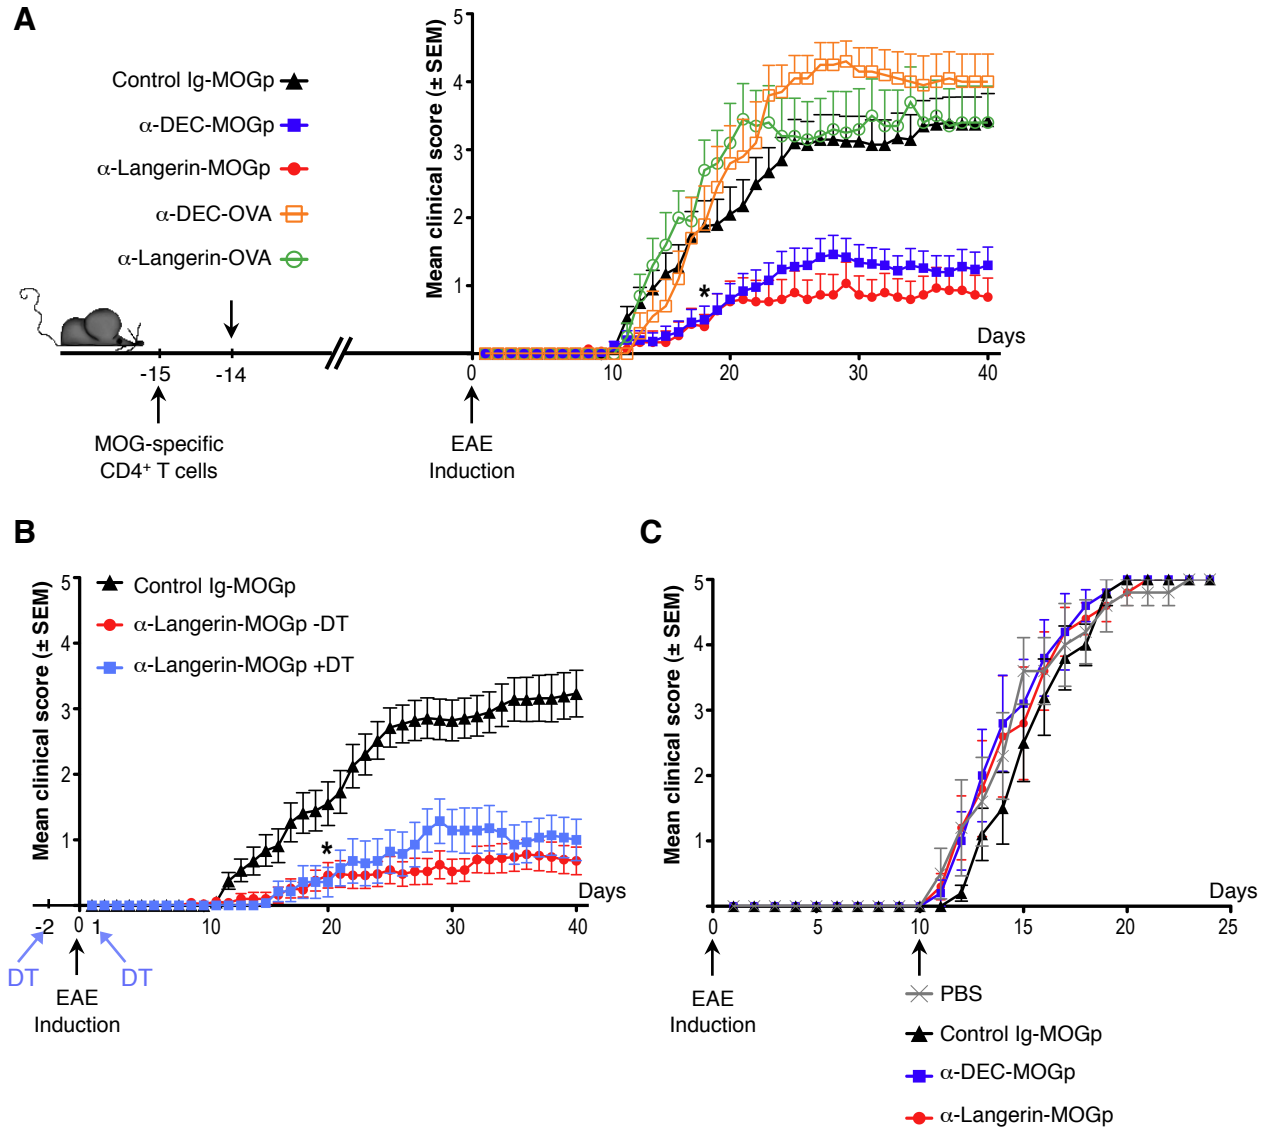

**Supplemental Figure 9.  $\alpha$ -DEC- and  $\alpha$ -Langerin conjugated with MOGp, but not OVA, protect from EAE.** (A) B6 mice were transferred with  $4 \times 10^6$  MOG-specific CD4<sup>+</sup> T cells one day before the inoculation of 3  $\mu$ g  $\alpha$ -receptor mAbs conjugated with MOGp or OVA. 14 days after, EAE was induced by immunization with MOG35-55p in CFA. The course of EAE is shown as the mean clinical score  $\pm$  SEM of 10-20 animals in 2-4 experiments.  $\alpha$ -DEC- and  $\alpha$ -Langerin- MOGp were statistically significant (2-way ANOVA and Bonferroni's post hoc testing) from  $\alpha$ -DEC- and  $\alpha$ -Langerin- OVA starting at day 18 (\*),  $p < 0.05$ . (B) As in A, but mice were inoculated i.v. (2 day before EAE induction) and i.p. (1 day after EAE induction) with 250 ng DT. Mean  $\pm$  SEM of 15-20 animals in 3-4 experiments. No significant differences were found between mice vaccinated with  $\alpha$ -Langerin-MOGp +/- DT. On the other hand,  $\alpha$ -Langerin-MOGp groups were significantly different from control Ig-MOGp starting at day 20 (\* =  $p < 0.05$ ; 2-way ANOVA and Bonferroni's post hoc testing). (C) As in A, but  $\alpha$ -receptor-MOGp mAbs were inoculated 10 days after EAE induction. No significant differences between the groups were found. Shown is one experiment of two with 5 animals per group.

## Supplemental Figure 10

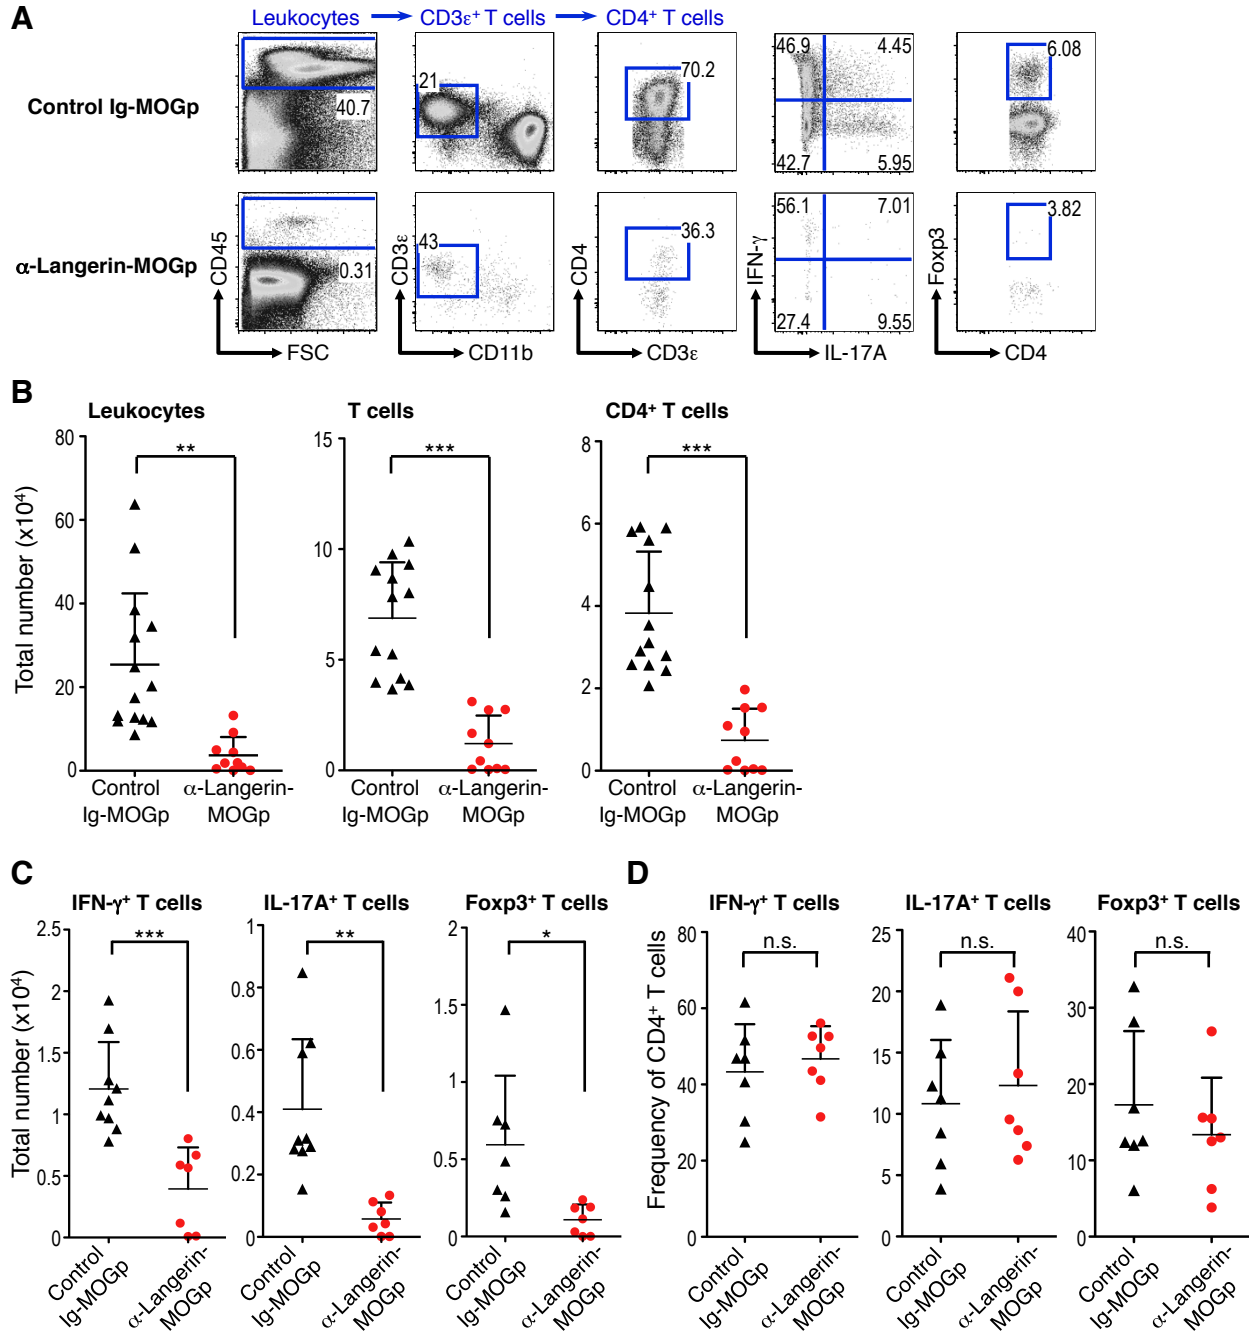

**Supplemental Figure 10. Flow cytometric analysis of the CNS-infiltrating T cells in  $\alpha$ -Langerin-MOGp inoculated mice at the peak of EAE.** B6 mice inoculated with 3  $\mu$ g of  $\alpha$ -Langerin- or control Ig-MOGp (given one day after transfer of  $4 \times 10^6$  MOG-specific CD4<sup>+</sup> T cells), were challenged for EAE induction 14 days later. At the peak of the disease (day 19-22), the spinal cord infiltrating cells were analyzed by FACS. **(A)** Shown is a representative FACS plot of CNS-infiltrating cells. **(B)** The total number of CD45<sup>+</sup> leukocytes (left panel), CD3 $\epsilon$ <sup>+</sup> T cells (middle panel), and CD4<sup>+</sup> T cells (right panel) is shown as the mean  $\pm$  SD of 10-14 animals in 2-3 different experiments. **(C)** The total number of CD4<sup>+</sup> T cells producing IFN- $\gamma$  and IL-17A after a short re-stimulation with PMA/ionomycin, or expressing Foxp3 is shown as the mean  $\pm$  SD of 7 animals in 2 experiments. **(D)** As in C, but the frequency of CD4<sup>+</sup> T cells is shown. n.s. is non-significant.

**SUPPLEMENTAL TABLE 1.  $\alpha$ -Langerin and  $\alpha$ -DEC mAbs prevent the development and progression of EAE.**

| <b>Treatment</b>                         | <b>Disease Incidence</b> | <b>Day of Onset<sup>A</sup></b> | <b>Mean Peak Clinical Score<sup>B</sup></b> | <b>Cumulative disease index<sup>C</sup></b> |
|------------------------------------------|--------------------------|---------------------------------|---------------------------------------------|---------------------------------------------|
| <b>PBS</b>                               | 10/10 (100%)             | 13.1 $\pm$ 1.7                  | 5                                           | 126.7 $\pm$ 11.4                            |
| <b>Control Ig-MOGp</b>                   | 18/20 (90%)              | 16.3 $\pm$ 4.5                  | 4.2 $\pm$ 0.92                              | 82.2 $\pm$ 30.8                             |
| <b><math>\alpha</math>-DEC-MOGp</b>      | 12/20 (60%)              | 18.8 $\pm$ 9.3                  | 3 $\pm$ 0.6                                 | 48.4 $\pm$ 22.15                            |
| <b><math>\alpha</math>-Langerin-MOGp</b> | 7/15 (46.7%)             | 19.7 $\pm$ 5.2                  | 2.6 $\pm$ 0.7                               | 38.4 $\pm$ 21                               |
| <b><math>\alpha</math>-DCIR2-MOGp</b>    | 10/10 (100%)             | 14.9 $\pm$ 1.7                  | 3.65 $\pm$ 1                                | 76.65 $\pm$ 19.3                            |
| <b><math>\alpha</math>-Trem14-MOGp</b>   | 9/10 (90%)               | 14.3 $\pm$ 2.8                  | 3.78 $\pm$ 0.97                             | 73.6 $\pm$ 18.8                             |

<sup>A</sup> Day of onset was calculated as the first day of a clinical score  $\geq 1$  for each animal and average within each group.

<sup>B</sup> Mean peak clinical score was measured over the duration of disease per animal and average within each group.

<sup>C</sup> Cumulative disease index was calculated as the sum of daily clinical scores from each animal over the entire observation period, and reported as the average within each group.

Mean  $\pm$  SEM of 2-4 different experiments with a total of 10-20 mice is shown.
